# Supplementary material
Source: PubMed Central journal article supplement (PMC8045498)
Supplement: advancesADV2020003039-suppl1.pdf [file advancesADV2020003039-suppl1.pdf]

## Supplemental Material and Methods

### Clustering

Unsupervised hierarchical clustering was done in R using Euclidean distance and Ward's clustering method. Samples were clustered based on the segmented and corrected log2 ratios in all focal and broad regions identified by GISTIC.

### HRS density

HRS cells per mm<sup>2</sup> were automatically detected by Qupath using the following parameters: background radius 8 µm, median filter radius 0 µm, sigma 1.2 µm, minimum area 90 µm<sup>2</sup>, maximum area 400 µm<sup>2</sup>, CD30 staining intensity threshold 0.2, max background intensity 2, cell expansion 2 µm, score compartment: Cell DAB OD mean. From the two-dimensional HRS density in biopsy slides, we calculated the three-dimensional HRS density in the MTV. To simplify this conversion, tumors were assumed spherical with a volume defined by the MTV, allowing the radius to be inferred ( $\sqrt[3]{\frac{3}{4} \frac{MTV}{\pi}}$ ). Using the radius, the area of the spherical tumor was calculated ( $4\pi R^2$ ) and multiplied by the two-dimensional HRS density to generate the number of HRS cells in that area. As the volume of a sphere can be inferred from the area ( $\text{area} * \frac{1}{3}R$ ), this number was multiplied accordingly to generate the HRS density in the MTV.

## Supplemental tables

**Supplemental Table 1.** Characteristics of CN studies in cHL to date.

| Ref | Study                             | Material                    | Cases             | Technique  | Scope                                                              |
|-----|-----------------------------------|-----------------------------|-------------------|------------|--------------------------------------------------------------------|
| 16  | Küppers <i>et al</i> (2001)       | single HRS cell suspensions | 6                 | FISH       | <i>MDM2</i>                                                        |
| 10  | Joos <i>et al</i> (2002)          | microdissected HRS cells    | 41                | aCGH       | genome-wide                                                        |
| 11  | Martin-Subero <i>et al</i> (2002) | cytogenetic suspensions     | 31                | FICTION    | <i>BCL11A</i> and <i>REL</i>                                       |
| 12  | Chui <i>et al</i> (2003)          | microdissected HRS cells    | 20 + 4 cell lines | aCGH       | genome-wide                                                        |
| 13  | Giefing <i>et al</i> (2008)       | HL cell lines               | 4 cell lines      | aCGH + PCR | small homozygous deletions                                         |
| 14  | Hartmann <i>et al</i> (2008)      | microdissected HRS cells    | 10                | aCGH       | genome-wide                                                        |
| 14  | Hartmann <i>et al</i> (2008)      | cytogenetic suspensions     | 28                | FISH       | <i>NOTCH1</i> (9q34), <i>STAT6</i> (12q13) and <i>JUNB</i> (18p13) |
| 18  | Green <i>et al</i> (2010)         | microdissected HRS cells    | 23                | qPCR       | <i>PD-L1</i>                                                       |
| 5   | Steidl <i>et al</i> (2010)        | microdissected HRS cells    | 53                | aCGH       | genome-wide                                                        |
| 15  | Slovak <i>et al</i> (2011)        | microdissected HRS cells    | 27                | aCGH       | genome-wide                                                        |
| 25  | Nomoto <i>et al</i> (2012)        | FFPE tumor biopsy           | 44                | FICTION    | <i>TNFAIP3</i>                                                     |
| 24  | Twa <i>et al</i> (2014)           | FFPE tumor biopsy           | 20                | FISH       | <i>PD-L1</i> and <i>PD-L2</i>                                      |
| 17  | Ansell <i>et al</i> (2015)        | FFPE tumor biopsy           | 10                | FISH       | <i>PD-L1</i> and <i>PD-L2</i>                                      |
| 4   | Reichel <i>et al</i> (2015)       | FACS sorted HRS cells       | 10 + 2 cell lines | WES        | genome-wide                                                        |

|    |                                              |                       |     |      |                                     |
|----|----------------------------------------------|-----------------------|-----|------|-------------------------------------|
| 22 | Roemer <i>et al</i> (2016)                   | FFPE                  | 108 | FISH | <i>PD-L1</i> and <i>PD-L2</i>       |
| 21 | Van Roosbroeck <i>et al</i> (2016)           | FFPE tumor biopsy     | 200 | FISH | <i>JAK2</i>                         |
| 20 | Juskevicius <i>et al</i> (2018) <sup>a</sup> | FFPE + FACS + WGA     | 10  | aCGH | genome-wide                         |
| 19 | Tanaka <i>et al</i> (2018)                   | FFPE tumor biopsy     | 20  | FISH | <i>PD-L1/PD-L2</i> and <i>CIITA</i> |
| 23 | Wienand <i>et al</i> (2019)                  | FACS sorted HRS cells | 23  | WES  | genome-wide                         |

<sup>a</sup> although this was a genome-wide study, no raw data were available; frequencies could not be accurately determined, but were estimated based on the accompanying figure.

**Supplemental Table 2.** FISH validation of CNA at low estimated clonal fraction.

| Case | Estimated clonal fraction (%) | Observation<br>Ichor CNA | Probes <sup>a</sup><br>(fluorochrome)(location)             | # of HRS cells analyzed | FISH pattern [# of HRS cells] <sup>b</sup>                      | Interpretation                                                                 |
|------|-------------------------------|--------------------------|-------------------------------------------------------------|-------------------------|-----------------------------------------------------------------|--------------------------------------------------------------------------------|
| HL19 | 2,4                           | gain 2p                  | LSI <b>NMYC</b> (SG)(2p24) / <b>CEP2</b> (SO) / CEP12 (SA)  | 5                       | 5G/4R/3A[3]; 5G/4R/2A[1]; 5G/4R/6A[1]                           | Gain <b>NMYC</b> relative to CEP12 in 4/5 cells                                |
|      |                               | loss 6q                  | <b>MYB</b> (DC,BA)(6q23) <sup>c</sup>                       | 13                      | 2DC [13]                                                        | Loss of <b>MYB</b> relative to CEP12 control in 4/5 cells in paired experiment |
| HL26 | 3,4                           | gain 5p                  | <b>D5S23,D5S721</b> (SG)(5p15) / LSI <b>EGR1</b> (SO)(5q31) | 4                       | 5G/3R [1]; 4G/3R [3]                                            | Gain of <b>D5S23,D5S721</b> relative to <b>EGR1</b> in 4/4 cells               |
|      |                               | loss 6q                  | <b>MYB</b> (DC,BA)(6q23) <sup>c</sup>                       | 4                       | 2DC [2]; 1DC [2]                                                | Loss of <b>MYB</b> in at least 2/4 cells, in 4/4 cells relative to 5p          |
| HL15 | 3,6                           | gain 2p                  | LSI <b>ALK</b> (DC BA)(2p23) / CEP2 (SA)                    | 9                       | 3DC/2A [7]; 3DC/3A [2]                                          | Gain of <b>ALK</b> relative to CEP2 in 7/9 cells                               |
| HL44 | 3,9                           | loss 1p                  | <b>CDKN2C</b> (G) (1p32) / CKS1B (TR)(1q21) /               | 8                       | 4G/3R [1]; 3G/5R [2]; 4G/5R [2]; 3G/6R[1]; 4G/6R [1]; 5G/7R [1] | Loss of <b>CDKN2C</b> relative to 1q in 7/8 cells                              |
|      |                               | loss 6q                  | <b>MYB</b> (DC,BA)(6q23) / CEP8 (SA) <sup>d</sup>           | 5                       | 3DC/5A [4];3DC/6A [1]                                           | Loss of <b>MYB</b> relative to CEP8 in 5/5 cells                               |
|      |                               | gain 9p                  | <b>JAK2</b> (DC,BA)(9p24) / CEP8 (SA) <sup>d</sup>          | 5                       | 2DC/2A [2]; 8-10DC/5A [1]; 11DC/5A [1]; 10-11DC/4-5A [1]        | Gain of <b>JAK2</b> relative to CEP8 in 3/5 cells                              |

|      |     |         |                                                       |   |                                    |                                                       |
|------|-----|---------|-------------------------------------------------------|---|------------------------------------|-------------------------------------------------------|
| HL58 | 4,4 | gain 2p | LSI <b>ALK</b> (DC BA)(2p23) / CEP7 (SA) <sup>a</sup> | 8 | 3-6DC/2-3A [8]                     | Gain of <b>ALK</b> relative to CEP7 in 8/8 cells      |
|      |     | loss 6q | <b>MYB</b> (DC,BA)(6q23) / CEP7 (SA) <sup>d</sup>     | 5 | 4DC/4A [3]; 2DC/4A [1]; 3DC/2A [1] | Loss of <b>MYB</b> relative to CEP7 in only 1/5 cells |

<sup>a</sup> LSI: locus specific identifier; DC: dual color; BA: break apart; CEP: centromeric probe; SA: spectrum aqua (A); SG: spectrum green (G); SO: spectrum orange (R); TR: texas red (R); DC,BA: dual color break-apart. The probe in bold hybridizes with the region gained/lost in cfDNA analysis. As targets for control probes, we chose regions not affected by CNA by ichorCNA, preferentially on the chromosome of interest.

<sup>b</sup> The FISH patterns of the cells analyzed is shown, with the number of cells with a given pattern between square brackets. G: spectrum green signal; R: spectrum orange signal; A: spectrum aqua signal.

<sup>c</sup> Due to failed hybridization of CEP6 probes, the number of control signals was derived from the paired FISH experiment (CEP12 for HL19; *EGR1* for HL26).

<sup>d</sup> Due to technical problems with CEP6 (failed hybridization) and with CEP9 (cross-hybridization) CEP7/CEP8 were used instead.

**Supplemental Table 3.** Recurrent gains and losses in our patient cohort and comparison with literature.

| Locus            | GISTIC wider region   | Size (Mb) | Encompassed genes*               | n <sup>§</sup> (%) | Reported incidence <sup>&amp;</sup><br>(range) | References                       |
|------------------|-----------------------|-----------|----------------------------------|--------------------|------------------------------------------------|----------------------------------|
| GAINS            |                       |           |                                  |                    |                                                |                                  |
| 1q33.1 - q32.2   | 186490000 - 208010000 | 21,5      | <i>IL10, PIK3C2B, MDM4,</i>      | 36 (22%)           | 19% (8-30)                                     | 5,14,20                          |
| 2p16.1 - p15     | 58990000 - 63510000   | 4,5       | <b>REL, BCL11A</b> , <i>XPO1</i> | 114 (69%)          | 50% (28-70)                                    | 4-5,10-12,14,20,23               |
| 4q23 - q24       | 99490000 - 106010000  | 6,5       | <i>EIF4E, NFKB1</i>              | 16 (10%)           | 8%                                             | 10                               |
| 5p15.33 - p13.3  | 1 - 30010000          | 30        | <i>TERT</i>                      | 83 (50%)           | 32% (14-50)                                    | 10,20,23                         |
| 8q24.13 - q24.3  | 123490000 - 146364022 | 22,9      | <b>MYC</b> , <i>SHARPIN</i>      | 31 (19%)           | 34% (9-67)                                     | 5,14-15,20                       |
| 9p24.3 - p24.1   | 1 - 6010000           | 6         | <b>JAK2, PD-L1</b>               | 82 (50%)           | 48% (23-97)                                    | 5,10,12,14,18-19, 20-22,24,14,20 |
| 11q13.1 - q13.3  | 65490000 - 68500000   | 3         | <b>CLCF1</b> , <i>PACS1</i>      | 31 (19%)           | 25% (10-40)                                    | 14,20                            |
| 12q13.13 - q14.1 | 52490000 - 62010000   | 9,5       | <b>GLI1, LRP1, STAT2, STAT6</b>  | 82 (50%)           | 39% (10-67)                                    | 10,14,16,20                      |
| 15q21.3 - q26.3  | 55490000 - 102531392  | 47        | <i>FES, PIAS1, PRC1</i>          | 19 (11%)           | X                                              | X                                |

---

LOSSES

|                     |                          |      |                                                        |          |             |                      |
|---------------------|--------------------------|------|--------------------------------------------------------|----------|-------------|----------------------|
| 1p36.33 -<br>p36.13 | 1 - 19170000             | 19,2 | <i>RPL22, TNFRSF4,<br/>TNFRSF8, TNFRSF14,<br/>TP73</i> | 59 (36%) | 17% (13-20) | 5,20,23              |
| 1p34.1 - p21.1      | 45460000 - 104620000     | 59,2 | <i>BCL10</i>                                           | 39 (23%) | 13% (7-20)  | 5,10,20              |
| 2q35 - q37.3        | 217360000 -<br>243199373 | 25,8 | <b><i>BOK, INPP5D,<br/>TRAF3IP1</i></b>                | 12 (7%)  | 20%         | 20                   |
| 3p26.3 - p13        | 1 - 71600000             | 71,6 | <i>RASSF1, TLR9, TRAIIP,<br/>VHL</i>                   | 29 (17%) | X           | X <sup>#</sup>       |
| 4q34.1 - q35.2      | 173960000 -<br>191154276 | 17,2 | <i>CASP3</i>                                           | 83 (50%) | 40% (30-50) | 14,20                |
| 6q22.1 - q27        | 116980000 -<br>171115067 | 54,1 | <b><i>BCLAF1, SGK1,<br/>TNFAIP3</i></b>                | 79 (48%) | 41% (21-60) | 5,12-<br>14,20,23,25 |
| 6q25.3 - q27        | 160320000 -<br>171115067 | 10,8 | <i>DLL1</i>                                            | 92 (55%) | 50%         | 20,23                |
| 7q31.31 - q34       | 117880000 -<br>141540000 | 23,7 | <i>HIPK2</i>                                           | 47 (28%) | 26% (17-30) | 16,21,25             |
| 8p22.2 - p21.2      | 16980000 - 26610000      | 9,6  | <i>CNOT7</i>                                           | 71 (43%) | 25% (20-30) | 14,20                |

|                   |                      |      |                            |          |             |                |
|-------------------|----------------------|------|----------------------------|----------|-------------|----------------|
| 11q21 - q24.3     | 93910000 - 130030000 | 36   | <i>EL24, TIRAP, TBRG1</i>  | 73 (44%) | 29% (10-58) | 5,12,20        |
| 12q21.31 - q24.33 | 85410000 - 133851895 | 48,5 | <i>NCOR2, SH2B3, SOCS2</i> | 11 (7%)  | X           | X <sup>#</sup> |

---

\* a selection of genes within the region of interest is shown, based on known or potential involvement in HL or NHL. Genes located within the MCR are indicated in bold.

\$ number of cases and frequency of events including all genes in the GISTIC wider region among the aberrant diagnostic cases from our cohort (n=166).

& for events reported in more than 1 study, the average frequency and range is given.

# these aberrations were reported in one case in Juskevicius *et al* (2018) and therefore not recurrent.

**Supplemental Table 4.** FISH validation of novel GISTIC regions.

| Case | Estimated clonal fraction (%) | Observation Ichor CNA | Probes (fluorochrome)(location)                                          | # of HRS cells analyzed | FISH pattern [# of HRS cells]                        | Interpretation                                            |
|------|-------------------------------|-----------------------|--------------------------------------------------------------------------|-------------------------|------------------------------------------------------|-----------------------------------------------------------|
| HL33 | 6.7                           | loss 3p               | <b>FOXP1</b> (DC,BA)(3p14) / CEP7(SA) <sup>a</sup>                       | 10                      | 1DC/2A [5];2DC/3A [1];2DC/4A [4]                     | Loss of <b>FOXP1</b> relative to CEP7 in 10/10 cells      |
| HL43 | 16,7                          | loss 3p               | <b>FOXP1</b> (DC,BA)(3p14) / CEP8(SA) <sup>a</sup>                       | 10                      | 1 DC /3A [7];1 DC /2A [1]; 2 DC /4A [1];2 DC /8A [1] | Loss of <b>FOXP1</b> relative to CEP8 in 10/10 cells      |
| HL13 | 5,5                           | gain 15p              | LSI <b>PML</b> (SO)(15q24) / <i>RARA</i> (SG)(DC DF)(17q21) <sup>a</sup> | 12                      | 3R/2G [7];6R/4G [5]                                  | Gain of <b>PML</b> relative to <i>RARA</i> in 12/12 cells |
| HL49 | 7                             | gain 15p              | LSI <b>PML</b> (SO)(15q24) / <i>RARA</i> (SG)(DC DF)(17q21) <sup>a</sup> | 17                      | 3R/2G [3];4R/3G [11]; 5R/2G [1];5R/3G [2]            | Gain of <b>PML</b> relative to <i>RARA</i> in 17/17 cells |

<sup>a</sup> As targets for control probes, we chose regions not affected by CNA according to ichorCNA on other chromosomes, as the centromeric region of the chromosome with CNA was also affected by this CNA.

## Supplemental Figures

### Supplemental Figure 1

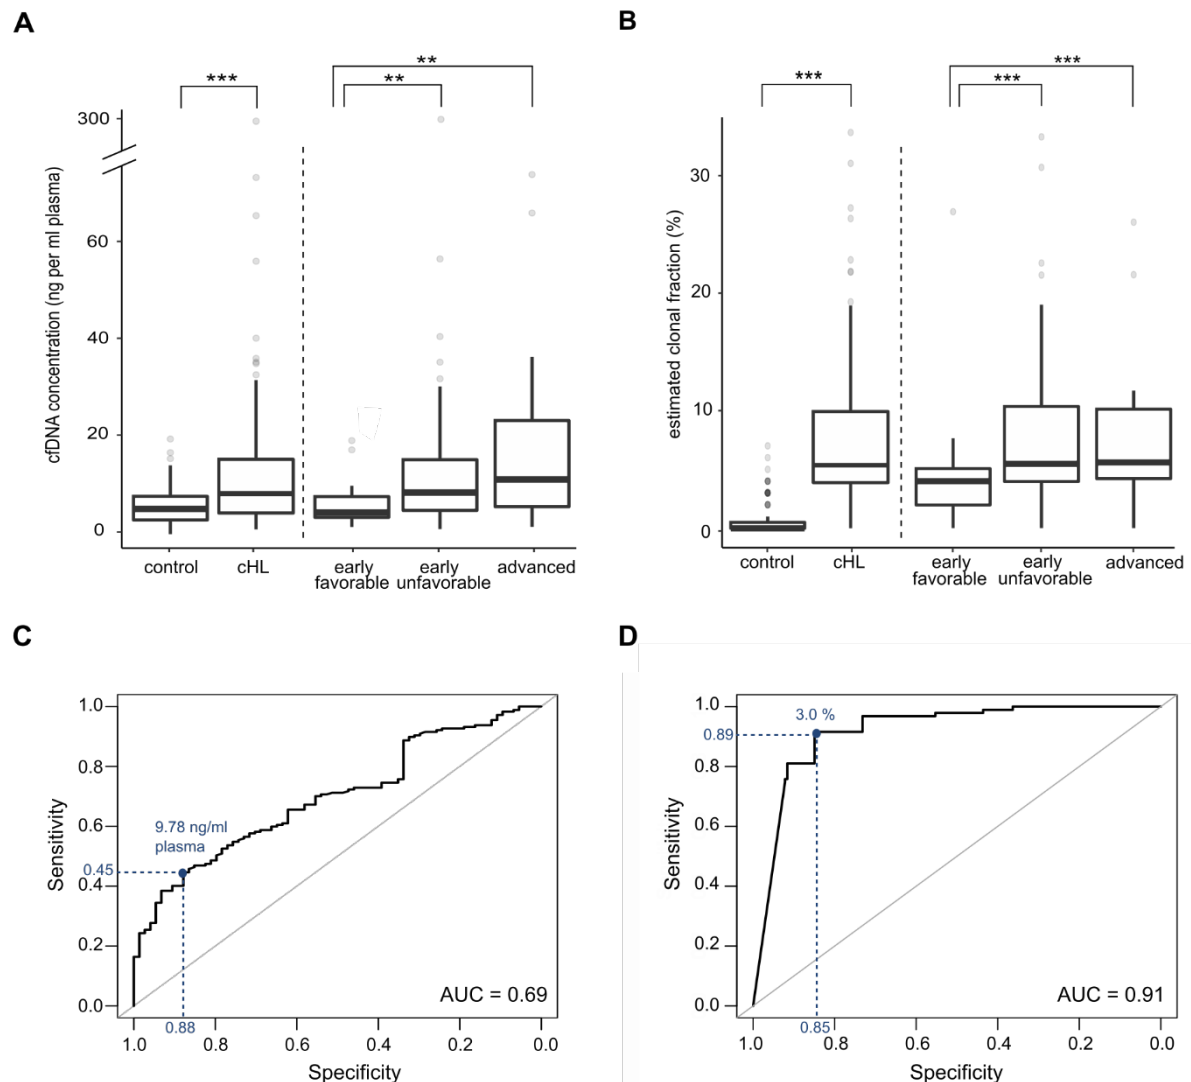

**Supplemental Figure 1. cfDNA and estimated clonal fractions in cHL patients versus controls.** (A-B) Box and whisker plots for cfDNA concentrations (A) and estimated clonal fractions (B) in controls versus cHL patients, grouped by disease category. Outliers are defined as values  $1.5 \times \text{IQR}$  below the first or above the third quartile. \* $P < .05$ , \*\* $P < .01$ , \*\*\* $P < .001$ . (C-D) ROC analysis for total cfDNA levels (C) and estimated clonal fractions (D) determines the optimal cut-off between cHL cases and controls based on the Youden index (blue). Corresponding sensitivity and specificity are indicated by dashed lines in blue. AUC: area under the curve.

Supplemental Figure 2

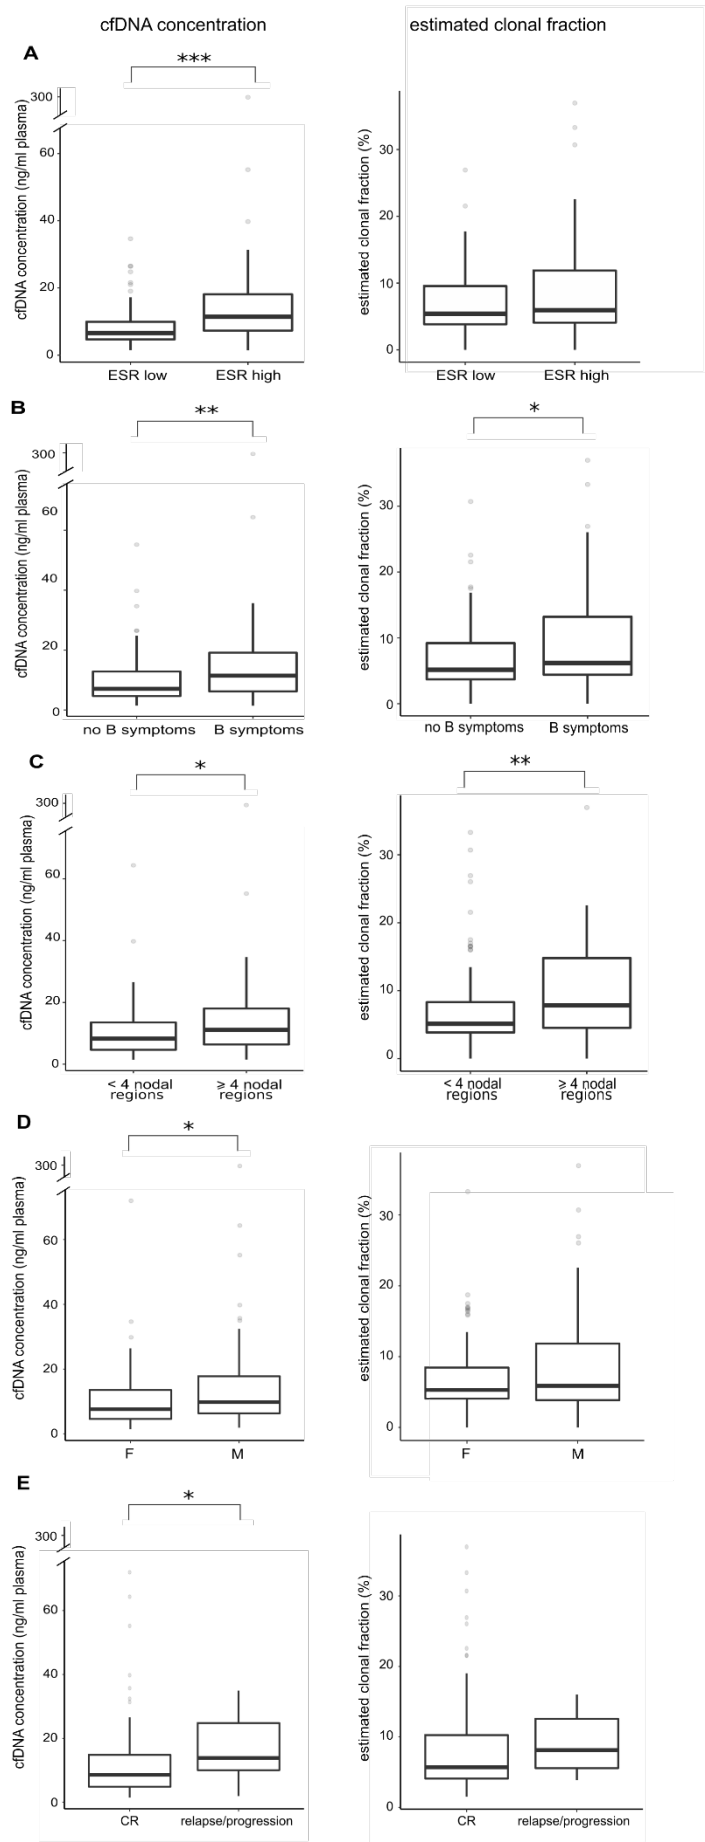

**Supplemental Figure 2. Association between clinical parameters and total cfDNA levels and estimated clonal fractions in cHL.** Box and whisker plots of total cfDNA levels (left) and estimated clonal fractions (right) at diagnosis for cases with (A) normal versus elevated ESR levels; (B) presence versus absence of B symptoms; (C) limited versus extensive nodal involvement; (D) female versus male gender; (E) treatment response versus treatment failure. Outliers are defined as values 1.5 x IQR below the first or above the third quartile. \*P < .05, \*\*P < .01, \*\*\*P < .001.

# Supplemental Figure 3

A

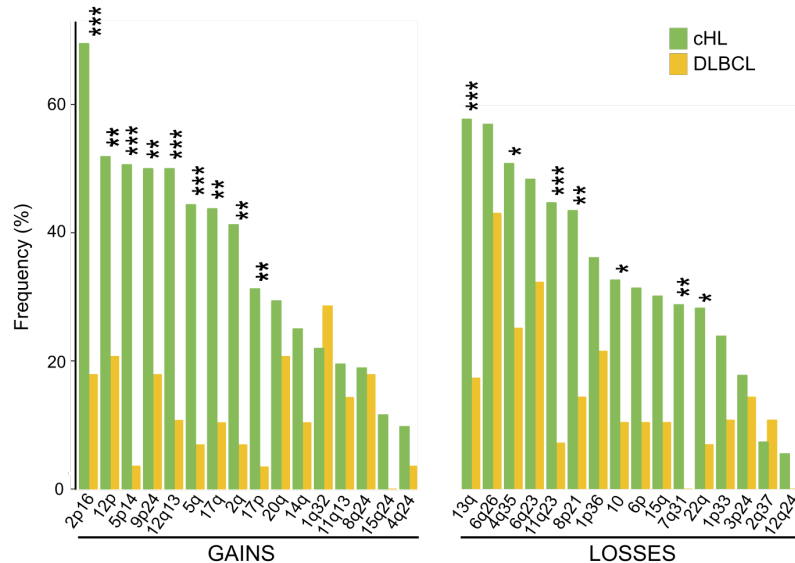

B

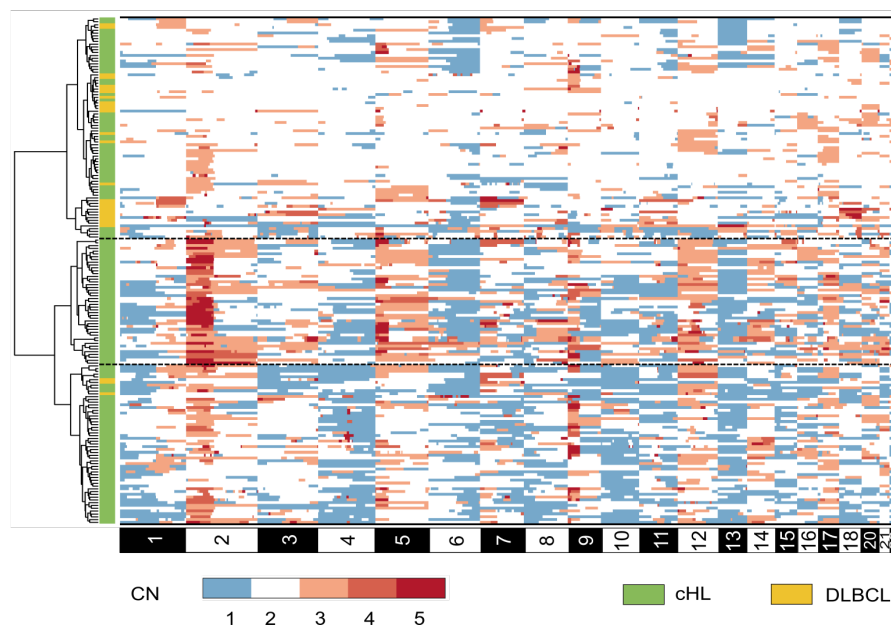

**Figure 3. CNA patterns in HL and DLBCL.** (A) Bar plot of the frequencies at which recurrent gains and losses in HL were observed in HL and DLBCL cases. CNA are plotted in descending order and statistically interpreted using Fischer's exact test. \* $P < 0.05$ , \*\* $P < 0.01$ , \*\*\* $P < 0.001$ . (B) Heat map of hierarchically clustered abnormal cHL (n= 164) and DLBCL (n=29) CNA profiles. Rows represent genome-wide CN profiles (blue = loss, white = copy neutral, red = gain/amplification). Samples are annotated according to disease (green = cHL, yellow = DLBCL). Unsupervised hierarchical clustering of CNA profiles segregated cHL from DLBCL in cases with higher clonal fractions (lower part of the graph). In cases with low clonal fraction, segregation was less successful (the upper third of the graph).

## Supplemental Figure 4

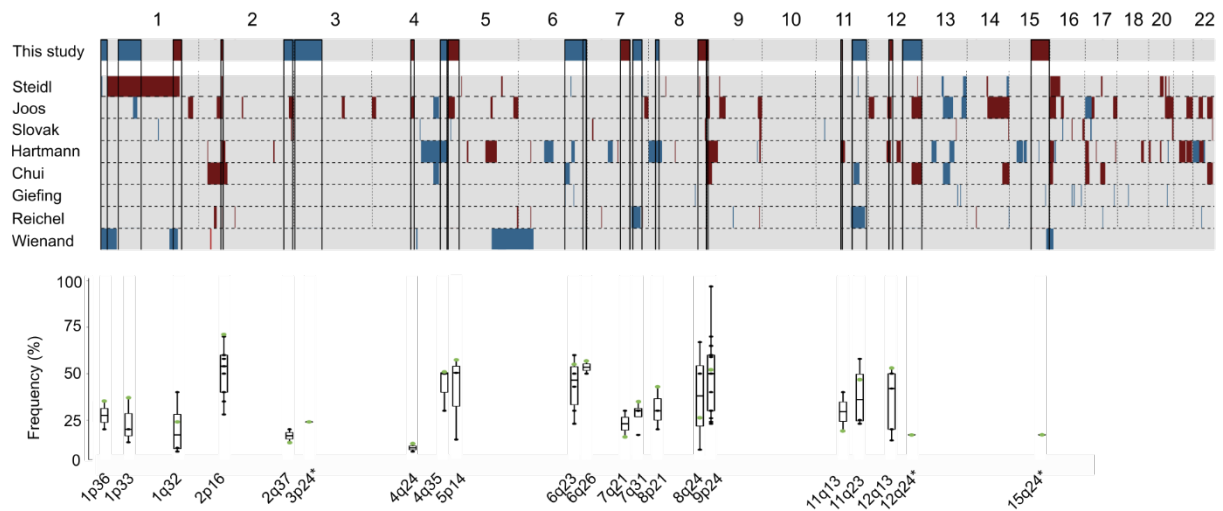

### Supplemental Figure 4. Recurrent CNA in previous studies compared to our cohort.

Heatmap showing recurrent gains (red) and losses (blue) as described in this study and in previous genome-wide CNA studies in cHL with accessible data. Recurrent CNA in our cohort are delineated by black rectangles for comparison purposes. The range of frequencies at which these regions have been reported in previous studies are plotted (see also Supplemental Table 1 and 2). The recurrence in our cohort is indicated in green. \*Three regions that are reported for the first time in our cohort.

## Supplemental figure 5

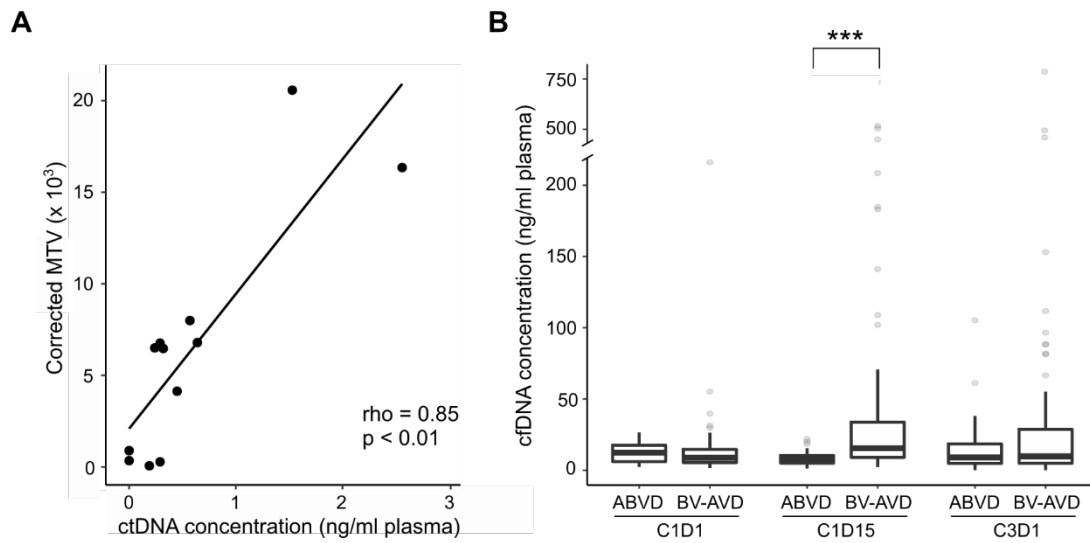

**Supplemental Figure 5. ctDNA as a tool for disease follow-up.** (A) Correlation between HRS density-corrected MTV and ctDNA concentration. MTV is corrected for HRS density by multiplying the MTV with the number of HRS cells per unit of volume. (B) Box and whisker plots of cfDNA concentrations in ABVD versus BV-AVD arms at diagnosis, C1D15 and C3D1. \*\*\* $P < .001$
